*Original Article*

## The Czech registry of renal biopsies. Occurrence of renal diseases in the years 1994–2000

Ivan Rychlík<sup>1</sup>, Eva Jančová<sup>1</sup>, Vladimír Tesař<sup>1</sup>, Alexander Kolský<sup>2</sup>, Jiří Lácha<sup>3</sup>, Josef Stejskal<sup>4</sup>, Alena Stejskalová<sup>5</sup>, Jiří Dušek<sup>6</sup> and Vladimír Herout<sup>7</sup>, on behalf of the Czech Registry of Renal Biopsies

<sup>1</sup>1st Department of Medicine and <sup>5</sup>1st Department of Pathology, 1st Faculty of Medicine, <sup>4</sup>Department of Pathology and <sup>6</sup>1st Department of Paediatrics, 2nd Faculty of Medicine, Charles University, <sup>2</sup>Department of Paediatrics, Thomayer Teaching Hospital, <sup>3</sup>Department of Nephrology, Transplant Centre, Institute for Clinical and Experimental Medicine, Prague and <sup>7</sup>1st Department of Metabolic Care, Faculty of Medicine, Charles University, Hradec Králové, The Czech Republic

### Abstract

**Background.** This report describes data collected by the Czech Registry of Renal Biopsies (CRRB).

**Methods.** Twenty-eight centres provided data on all biopsies of native kidneys performed in the Czech Republic (population 10.3 million) over the period 1994–2000. Data on serum creatinine concentration (sCr), 24 h proteinuria, haematuria, serum albumin level, arterial hypertension, diabetes mellitus, histological diagnosis and complications after renal biopsy were collected.

**Results.** Altogether 4004 biopsies in 3874 patients were performed (males 57.9%, children  $\leq 15$  years 17.7%, elderly  $>60$  years 14.3%). Microhaematuria was present in 65.9%, macrohaematuria in 9.2%, nephrotic proteinuria ( $\geq 3.5$  g/24 h) in 39.3%, and low-grade proteinuria ( $< 3.5$  g/24 h) in 41.4%. Among adults, hypertension was present in 45.2%, mild renal insufficiency in 23% (sCr 111–200  $\mu\text{mol/l}$ ) and advanced renal insufficiency in 13.7% (sCr 201–400), while 11.5% of patients had sCr  $>400$   $\mu\text{mol/l}$ . The most frequent renal diseases were primary (59.8%) and secondary (25.4%) glomerulonephritis (GN). Tubulointerstitial nephritis (TIN) was observed in 4.4% and hypertensive nephroangiosclerosis in 3.4%. The samples were non-diagnostic in 4.6%. Among primary GNs, the most frequent diagnoses were: IgA nephropathy (IgAN) 34.5%, minimal change disease (MCD) 12.4%, non-IgA mesangioproliferative GN (MesGN) 11.3%, focal segmental glomerulosclerosis (FSGS) 10.8% and membranous GN (MGN) 9.3%. Among secondary GNs, systemic lupus erythematosus

(SLE) represented 23.0%, necrotizing vasculitis (NV) 15.5%, Henoch–Schönlein purpura 5.7%, thin basement membrane glomerulopathy (TBN) 19.3%, Alport syndrome 6.9%, renal amyloidosis 9.9% and myeloma kidney 2.9%. Among children, the most common were IgAN (19.2%), MCD (17.6%) and TBM glomerulopathy (12.3%), while among the elderly the most common were MGN (11.0%), NV (10.7%) and amyloidosis (9.6%). The most common in patients with nephrotic proteinuria were MCD (50.5%) among children, but IgAN (24.6%) in adults aged 16–60 years and MGN (16.8%) among the elderly. IgAN (21.3%) and FSGS (8.3%) were the most common diagnoses among patients with mild renal insufficiency, but TIN (11.6%) and NV (11.3%) were the most common in more advanced renal insufficiency. Since 1999, diabetic patients represented 12.2% of adults, with mean proteinuria 8.9 g/24 h; diabetic glomerulosclerosis was found in 42.4% (with microhaematuria present in 66%) and non-diabetic renal diseases in 47.5% (IgAN in 17.5%, MGN and NAS in 11.1% and NV in 9.5%). The mean annual incidence (per million population) was: primary GN 32.4, secondary GN 13.8, IgAN 11.2, MCD 4.0, MesGN 3.7, FSGS 3.5, SLE 3.2, MGN 3.0, TBM 2.7, TIN 2.4 and NV 2.1. Ultrasound needle guidance was used in 56%, preferably in children (79%). The frequency of serious complications (gross haematuria, symptomatic haematoma, blood transfusion) remained at 3%.

**Conclusion.** The CRRB provides important data on the epidemiology of GN based on a whole country population.

Correspondence and offprint requests to: I. Rychlík, MD, PhD, Associate Professor, Šrobárova 50, 10034 Prague 10, The Czech Republic. Email: rychlik@cesnet.cz

**Keywords:** epidemiology; glomerulonephritis; nephropathy; renal biopsy; registry

## Introduction

Glomerulonephritis (GN) is a relatively rare disease with numerous subtypes. Most regional nephrology centres see only a limited number of patients with each type of GN every year. Information about the prevalence and incidence of GN in the general population is rather scarce; comprehensive epidemiological surveys are difficult to undertake, especially since the onset of most cases of GN is 'silent' so the diagnosis is often incidental, made by urine testing during a routine medical examination. Developing a regional and then a national registry gave us the opportunity to learn more about the epidemiology of GN.

Current epidemiological data of renal disease in Europe are available from large national renal biopsy registries from Italy [1], Denmark [2] and Spain [3]. Information derived from local or limited national registries of renal biopsy has been also reported from European [4] and other countries [5–7]. Many other reports have also been published dealing with specific population groups (elderly, native Indians, etc.) or with specific diagnoses (nephrotic syndrome, rapidly progressive GN, vasculitis, etc.) or with local one-centre experience.

In 1993, nephrologists from 12 leading centres in the Czech Republic established a national registry of biopsies of native kidneys recording histopathological, clinical and laboratory data. The Czech Registry of Renal Biopsies (CRRB) has been working continuously since 1994 and the number of participating renal units has risen to 28, representing nearly all Czech renal units currently performing renal biopsy.

The aims of CRRB are: (i) to study the epidemiology of renal disease based on histological diagnosis in the region of Central Europe covered by the Czech Republic; (ii) to identify the most frequent clinical syndromes; and (iii) to evaluate renal function at the time of renal biopsy.

## Materials and methods

Over a period of 7 years (1994–2000), renal biopsy records were collected from the Czech renal units. Using a simple questionnaire, the following data were collected at the time of renal biopsy: serum creatinine concentration (sCr), 24 h proteinuria, presence of haematuria (micro or macro), presence of arterial hypertension defined as a blood pressure >140/90 mmHg or permanent treatment with antihypertensive medication, clinical and histological diagnosis, clinical complications after renal biopsy (with serious complications defined as: clinically symptomatic subcapsular or perirenal haematoma, gross haematuria, presence of hypovolaemic shock and need for blood transfusion) and biopsy needle guidance technique [ultrasonography (USG), X-ray, computed tomography (CT), scintigraphy or transjugular route]. Since 1999, the serum albumin level and the presence of diabetes mellitus (DM) have also been recorded. To allow comparison with previous reports, we defined children as ≤15 years, adults as age 16–60 years, and the elderly as age >60 years.

The clinical and laboratory conditions observed at the time of renal biopsy were reported as follows: (i) *nephrotic proteinuria*: ≥3.5 g/24 h; (ii) *urinary abnormalities*: persistent low-grade proteinuria (<3.5 g/24 h) with or without microhaematuria; (iii) *isolated haematuria*: presence of micro- or macrohaematuria, without any proteinuria; (iv) *nephritic syndrome*: combination of haematuria, arterial hypertension and reduced renal function (sCr >110 µmol/l); (v) *mild renal insufficiency* was defined as sCr 111–200 µmol/l; and (vi) *advanced renal insufficiency* was sCr >200 µmol/l. More than one of these six syndromes overlapped in some patients.

The indications for renal biopsy varied among centres according to local practice. Histological evaluation by light microscopy and immunofluorescence was performed routinely, combined with electron microscopy in a number of cases. Histological classification of renal diseases used the WHO recommendations (1995), but the slightly modified scheme of Schena [1] was used for statistical analysis. Renal diseases were divided into five groups. (i) Primary GN including minimal change disease (MCD), minor glomerular abnormalities (MGA), focal segmental glomerulosclerosis (FSGS), membranous GN (MGN), IgA nephropathy (IgAN), mesangioproliferative GN (MesGN), membranoproliferative GN (MPGN), crescentic GN (CGN) (defined as CGN not fulfilling the criteria for systemic disease), proliferative endocapillary GN (PEGN), sclerosing GN (ScGN) and unclassified GN. (ii) Secondary GN: (a) immune-mediated GN such as systemic lupus erythematosus (SLE), Henoch–Schönlein purpura (HSP), necrotizing vasculitis (NV) and Goodpasture's syndrome (GPS); (b) GN caused by dysgammaglobulinaemia or paraproteinaemia, such as renal amyloidosis (AM), light-chain deposit disease (LCDD), myeloma kidney (MM) and essential mixed cryoglobulinaemia; (c) GN associated with infectious diseases (non-streptococcal GN, endocarditis, shunt GN and others); (d) metabolic disorders, particularly diabetic nephropathy (DN); (e) hereditary nephropathies, i.e. Alport syndrome (AS), Fabry disease, thin basement membrane glomerulopathy (TBM) or other hereditary diseases. (iii) Acute and chronic tubulointerstitial nephritis (TIN) and acute tubular necrosis. (iv) Vascular diseases including benign and malignant nephroangiosclerosis (NAS), haemolytic-uraemic syndrome and thrombotic thrombocytopenic purpura (HUS/TTP), renal scleroderma and cortical necrosis. (v) Others, including end-stage renal disease (ESRD) of undetermined cause, miscellaneous (pre-eclampsia, rare nephropathies, etc.), unclassified nephropathies and normal histopathological findings.

## Data analysis

One clinician in each participating renal unit was responsible for supplying data to the Registry quarterly by mail. Data were stored on a personal computer, and for statistical analysis, the standard FoxPro2 database and statistics processor was used. The annual incidence was defined as the number of new cases per year related to the mean total population, expressed as per million population (p.m.p) per year.

## Results

The total population of the Czech Republic in the years 1994–2000 was ~10.3 million inhabitants, 98% were

Caucasians, with a male/female ratio of 48.7/51.3. The percentage of children (<15 years) decreased from 18.9% in 1994 to 16.3% in 2000, and the elderly population ( $\geq 60$  years) increased from 13.1% in 1994 to 14.0% in 2000. Mean age also increased, from 37.0 years in 1994 to 38.8 years in 2000. As far as the urban–rural distribution pattern is concerned, two-thirds lived in cities.

Over the 7 year study, a total of 4004 renal biopsy records were referred to the CRRB; these were performed in 3874 patients. A total of 130 records were identified as re-biopsy, with 40 of these carried out early due to inadequate sampling during the first biopsy, and 90 for therapeutic/diagnostic reasons at different time points of follow-up (range 2–70 months); a third renal biopsy was done in six patients.

During the study, the number of referring centres increased from 19 in 1994 (with five being paediatric nephrology departments) to 28 in 1997 (nine paediatric). Since 1997 the registry has included almost all native kidney renal biopsies performed in the Czech Republic. The number of renal biopsies performed has increased year by year, being 44.1 p.m.p./year in 1994 and 69.3 p.m.p./year in 2000. We observed considerable variation in biopsy rate between centres: 53.9% of adult and 59.4% of paediatric renal biopsies were performed in Prague-based centres.

A total of 3294 biopsies (82.3% of the total) in adults and 710 biopsies in children age  $\leq 15$  years (17.7%) were registered. If children are considered to be those aged <18 years, this age group had 1073 biopsies (26.4%). The age distribution is given in Table 1, with mean age being 10 years for children (range 0.5–15) and 42 years for adults (range 16–89). Mean age according to diagnosis was lowest in AS (17 years) and highest in dysgammaglobulinaemias (60 years). Male gender was associated most frequently with most diagnostic categories (Table 8), with only SLE (77.2%) and TBM (55.2%) being more frequent among females.

All biopsy samples were evaluated by light microscopy and immunofluorescence. However, immunofluorescence was not performed in the case of the lack of or poor quality of a tissue sample. The number assessed by electron microscopy varied from 15.0 to 75.5% of all samples; electron microscopy was used at the discretion of the pathologist.

Table 2 shows the annual percentage of each group of nephropathies, Tables 3 and 4 show the annual frequency of different forms of primary GN and secondary GN, respectively. Specimens were inadequate for diagnosis in 185 cases (4.6%). IgAN was the most frequent GN seen (34.5%).

The clinical and laboratory findings are displayed in Table 1. Proteinuria was less often present in children compared with adults: any proteinuria (64.1 vs 84.3%) and nephrotic range proteinuria (26.8 vs 42.0%). Arterial hypertension was present more commonly in adults (45.2%), and most often among patients suffering with malignant NAS (97.6%) and DN (78.1%), whereas hypertension was least common in patients with hereditary GN (9.6%) and with minor glomerular abnormalities (8.9%).

The sCr distribution pattern in patients with impaired renal function is given in detail in Table 1.

**Table 1.** Distribution according to age, gender, basic laboratory findings and arterial hypertension: comparison of children and adults (%)

|                                | Total | Children ( $\leq 15$ years) | Adults |
|--------------------------------|-------|-----------------------------|--------|
| Total number (100%)            | 4004  | 710                         | 3294   |
| Age (years)                    |       |                             |        |
| 0–5                            | 2.7   | 15.2                        | –      |
| 6–10                           | 5.9   | 33.1                        | –      |
| 11–15                          | 9.1   | 51.6                        | –      |
| 16–30                          | 26.7  | –                           | 32.5   |
| 31–45                          | 19.3  | –                           | 23.5   |
| 46–60                          | 21.9  | –                           | 26.7   |
| 61–75                          | 12.6  | –                           | 15.3   |
| > 75                           | 1.8   | –                           | 2.1    |
| Male gender                    | 57.9  | 53.2                        | 59.0   |
| Macrohaematuria                | 9.2   | 13.0                        | 8.3    |
| Microhaematuria                | 65.9  | 60.2                        | 67.1   |
| Proteinuria                    |       |                             |        |
| Low (<3.5 g/24 h)              | 41.4  | 37.3                        | 42.3   |
| Nephrotic ( $\geq 3.5$ g/24 h) | 39.3  | 26.8                        | 42.0   |
| sCr ( $\mu\text{mol/l}$ )      |       |                             |        |
| $\leq 110$                     | 59.5  | 94.2                        | 51.8   |
| 111–200                        | 19.4  | 3.4                         | 23.0   |
| 201–400                        | 11.5  | 1.7                         | 13.7   |
| 401–600                        | 4.4   | 0.1                         | 5.3    |
| > 600                          | 5.2   | 0.6                         | 6.2    |
| Arterial hypertension          | 38.7  | 9.1                         | 45.2   |

**Table 2.** Annual percentage of major groups of renal diseases ( $n = 4004$ )

|                                   | 1994 | 1995 | 1996 | 1997 | 1998 | 1999 | 2000 | Total |
|-----------------------------------|------|------|------|------|------|------|------|-------|
| Primary glomerulonephritis        | 64.9 | 65.5 | 58.2 | 61.3 | 58.9 | 55.5 | 57.0 | 59.8  |
| Secondary glomerulonephritis      | 21.7 | 24.0 | 23.5 | 24.3 | 24.4 | 28.0 | 29.3 | 25.4  |
| Tubulointerstitial nephritis      | 4.5  | 2.0  | 6.9  | 3.5  | 6.2  | 5.0  | 2.9  | 4.4   |
| Hypertensive nephroangiosclerosis | 3.4  | 5.2  | 3.5  | 3.1  | 3.0  | 2.8  | 3.0  | 3.4   |
| End-stage renal disease           | 2.2  | 1.0  | 1.6  | 1.4  | 0.4  | 1.5  | 0.6  | 1.2   |
| Miscellaneous                     | 0.4  | 0.1  | 0.8  | 0.9  | 0.3  | 0.1  | 0.1  | 0.4   |
| Non-diagnostic sample             | 2.5  | 1.2  | 4.6  | 5.2  | 5.1  | 6.4  | 6.5  | 4.6   |
| Normal findings                   | 0.7  | 1.0  | 0.9  | 0.3  | 1.7  | 0.7  | 0.6  | 0.8   |
| Total no. of cases (100%)         | 454  | 517  | 563  | 586  | 547  | 623  | 714  | 4004  |

**Table 3.** Annual incidence (%) of primary glomerulonephritis (*n*=2333), re-biopsies excluded

|                           | 1994 | 1995 | 1996 | 1997 | 1998 | 1999 | 2000 | Total |
|---------------------------|------|------|------|------|------|------|------|-------|
| MCD                       | 10.0 | 14.2 | 12.8 | 10.0 | 16.9 | 10.7 | 12.4 | 12.5  |
| MGA                       | 3.8  | 8.3  | 5.6  | 8.0  | 5.7  | 4.5  | 4.5  | 5.8   |
| FSGS                      | 9.3  | 8.9  | 11.0 | 10.7 | 8.0  | 17.3 | 10.0 | 10.8  |
| MGN                       | 7.2  | 7.7  | 9.4  | 12.0 | 8.6  | 9.2  | 10.3 | 9.3   |
| MesGN                     | 17.9 | 10.7 | 14.1 | 14.3 | 13.4 | 8.3  | 2.8  | 11.3  |
| IgAN                      | 33.1 | 30.5 | 33.8 | 29.7 | 38.0 | 33.0 | 41.8 | 34.5  |
| PEGN                      | 2.4  | 0.3  | 1.6  | 1.4  | 0.6  | 1.2  | 1.8  | 1.3   |
| MPGN                      | 6.6  | 8.0  | 3.1  | 4.9  | 2.6  | 4.8  | 3.0  | 4.6   |
| CGN                       | 2.4  | 3.4  | 2.5  | 4.3  | 1.0  | 3.3  | 5.0  | 3.2   |
| SGN                       | 3.5  | 1.8  | 3.5  | 1.4  | 2.6  | 3.9  | 2.0  | 2.7   |
| Unclassified GN           | 3.8  | 6.2  | 2.5  | 3.4  | 2.6  | 3.8  | 6.3  | 4.1   |
| Total no. of cases (100%) | 290  | 325  | 319  | 350  | 313  | 336  | 400  | 2333  |

CGN = crescentic glomerulonephritis; FSGS = focal segmental glomerulosclerosis; IgAN = IgA nephropathy; MCD = minimal change disease; MesGN = mesangioproliferative glomerulonephritis; MGA = minor glomerular abnormalities; MGN = membranous glomerulonephritis; MPGN = membranoproliferative glomerulonephritis; PEGN = proliferative endocapillary glomerulonephritis; SGN = secondary glomerulonephritis.

**Table 4.** Annual incidence (%) of secondary glomerulopathies (*n*=990), re-biopsies excluded

|                                    | 1994 | 1995 | 1996 | 1997 | 1998 | 1999 | 2000 | Total |
|------------------------------------|------|------|------|------|------|------|------|-------|
| Immune-mediated glomerulonephritis | 62.3 | 48.7 | 46.5 | 48.2 | 44.6 | 41.2 | 43.2 | 48.6  |
| Lupus nephritis                    | 24.7 | 28.6 | 23.3 | 23.0 | 21.5 | 21.2 | 21.4 | 23.0  |
| Necrotizing vasculitides           | 23.7 | 13.5 | 13.9 | 17.3 | 14.6 | 12.3 | 16.0 | 15.6  |
| Henoch–Schönlein purpura           | 10.3 | 4.2  | 4.6  | 6.5  | 6.9  | 4.7  | 4.9  | 5.7   |
| Goodpasture's syndrome             | 2.1  | 0.8  | 2.3  | 0    | 0.8  | 1.8  | 1.0  | 1.2   |
| Dysgammaglobulinaemias             | 12.4 | 18.5 | 17.8 | 15.8 | 14.6 | 13.5 | 13.1 | 14.9  |
| Renal amyloidosis                  | 7.2  | 10.1 | 10.8 | 7.9  | 11.5 | 10.6 | 10.2 | 9.9   |
| Myeloma kidney                     | 4.1  | 7.6  | 3.1  | 3.6  | 2.3  | 1.2  | 1.0  | 2.9   |
| Light-chain deposit disease        | 0    | 0    | 2.3  | 2.9  | 0    | 0    | 1.9  | 1.1   |
| Essential mixed cryoglobulinaemia  | 1.0  | 0.8  | 1.6  | 1.4  | 0.8  | 1.8  | 0    | 1.0   |
| Diabetic glomerulosclerosis        | 9.3  | 3.4  | 7.0  | 10.8 | 6.9  | 17.0 | 14.6 | 10.6  |
| Hereditary disorders               | 15.5 | 29.4 | 28.7 | 25.2 | 33.8 | 28.2 | 29.1 | 27.7  |
| Alport syndrome                    | 2.1  | 11.8 | 5.4  | 4.3  | 12.3 | 4.7  | 7.3  | 6.9   |
| Thin membrane disease              | 10.3 | 16.8 | 22.5 | 19.4 | 20.0 | 22.3 | 20.4 | 19.3  |
| Total no. of cases (100%)          | 97   | 119  | 129  | 139  | 130  | 170  | 206  | 990   |

Data were not available to interpret renal function in children according to size, so we simply report that 5.8% of children had an sCr >110 µmol/l.

Among adults with normal renal function (mean sCr = 70 µmol/l), mean age was 35 years, while 78.8% had proteinuria (mean 6.0 g/24 h), 75.8% also had haematuria at presentation and 28.5% were hypertensive. Among the group with renal insufficiency (sCr >110 µmol/l), a similar percentage had haematuria while mean age (50 years), presence of proteinuria (90.5%) and hypertension (63.4%) were higher. Data concerning dialysis treatment at the time of renal biopsy were not available, but 203 patients (5.2%) had sCr >600 µmol/l. The highest percentage of patients with sCr >600 µmol/l was found in GPS (58.4%), MM (37.9%) and CGN (29.3%). After excluding patients with sCr >600 µmol/l, the highest mean sCr levels were observed in CGN (274 µmol/l), NV (271 µmol/l) and TIN (252 µmol/l). The incidence of GN related to age is shown in Table 5.

More than one clinical syndrome was found in some patients and so a total of 6071 clinical syndromes were registered (Table 6). The most frequent

indications for performing renal biopsy in adults were nephrotic range proteinuria (39.3%) and urinary abnormalities (36.2%), but among children it was isolated haematuria.

Nephrotic proteinuria (Figure 1A) was the most common clinical presentation (overall frequency 39.3%) particularly among the elderly (59.0%). The distribution pattern of diagnoses differed with age (Table 7). Those with proteinuria >10 g/24 h comprised 23.5% of all patients and 34.6% of adults. Microhaematuria (66%), hypertension (52%) and renal insufficiency (46%) were found frequently with nephrotic range proteinuria.

Among the patients with urinary abnormalities (Figure 1B), all had low-grade proteinuria, 77.7% also had microhaematuria, with hypertension in 40.5%, and renal insufficiency in 44.5%. Mean age was 36 years. The most common disease was IgAN (23.1%) followed by SLE (7.4%).

Nephritic syndrome (Figure 1C) was observed in 19.1% of all cases. Mean age was 51 years and more than one-third of patients (36%) were in the age range 46–60 years. sCr >600 µmol/l was found in 13.2%.

**Table 5.** Incidence of glomerulopathies and TIN related to age (given as a percentage of the group, re-biopsies excluded)

| Diagnosis                    | ≤15 years | 16–30 years | 31–45 years | 46–60 years | >60 years |
|------------------------------|-----------|-------------|-------------|-------------|-----------|
| Total no. of cases           | 693       | 1041        | 750         | 851         | 554       |
| Primary GN                   | 67.0      | 68.7        | 60.5        | 53.2        | 44.4      |
| MCD                          | 26.2      | 10.2        | 9.0         | 6.4         | 9.8       |
| MGA                          | 12.0      | 6.3         | 5.3         | 1.3         | 1.6       |
| FSGS                         | 8.4       | 9.8         | 11.0        | 12.1        | 15.0      |
| MGN                          | 1.9       | 3.6         | 9.3         | 17.4        | 24.8      |
| MesGN                        | 11.8      | 11.9        | 9.7         | 6.1         | 4.1       |
| IgAN                         | 28.6      | 46.6        | 38.3        | 30.0        | 10.6      |
| PEGN                         | 1.3       | 0.7         | 2.0         | 1.3         | 2.0       |
| MPGN                         | 3.0       | 4.1         | 5.1         | 6.4         | 5.3       |
| CGN                          | 0.7       | 1.7         | 1.3         | 5.5         | 11.8      |
| SGN                          | 0.4       | 1.1         | 3.5         | 4.8         | 6.1       |
| Unclassified GN              | 3.4       | 2.2         | 4.4         | 6.4         | 6.4       |
| Secondary GN                 | 26.4      | 22.6        | 21.3        | 24.8        | 36.3      |
| Immune mediated              | 31.1      | 56.2        | 57.5        | 47.9        | 39.8      |
| Dysgammaglobulinaemia        | 0.6       | 2.6         | 10.6        | 22.8        | 38.3      |
| DM                           | 0.0       | 2.6         | 9.4         | 20.3        | 20.4      |
| Hereditary                   | 68.3      | 38.7        | 22.5        | 9.0         | 1.5       |
| Hypertensive nephrosclerosis | 0.0       | 0.6         | 7.3         | 8.5         | 6.3       |
| TIN                          | 3.6       | 3.0         | 4.9         | 4.8         | 6.0       |

CGN = crescentic glomerulonephritis; DM = diabetes mellitus; FSGS = focal segmental glomerulosclerosis; IgAN = IgA nephropathy; MCD = minimal change disease; MesGN = mesangioproliferative glomerulonephritis; MGA = minor glomerular abnormalities; MGN = membranous glomerulonephritis; MPGN = membranoproliferative glomerulonephritis; PEGN = proliferative endocapillary glomerulonephritis; SGN = secondary glomerulonephritis; TIN = tubulointerstitial nephritis.

**Table 6.** Clinical syndromes (*n* = 6071) at the time of renal biopsy (given as a percentage of all renal biopsies)

|                              | Total<br>( <i>n</i> = 4004) | Children<br>( <i>n</i> = 710) | Adults<br>( <i>n</i> = 3294) |
|------------------------------|-----------------------------|-------------------------------|------------------------------|
| Nephrotic proteinuria        | 39.3                        | 26.8                          | 42.0                         |
| Urinary abnormalities        | 36.2                        | 31.7                          | 37.1                         |
| Isolated haematuria          | 16.5                        | 32.7                          | 12.5                         |
| Nephritic syndrome           | 19.1                        | 1.8                           | 22.3                         |
| Mild renal insufficiency     | 19.4                        | 3.4                           | 23.0                         |
| Advanced renal insufficiency | 21.1                        | 2.4                           | 25.2                         |

In some patients, more than one clinical syndrome was found; for instance, nephrotic proteinuria associated with renal insufficiency.

The most frequent diagnosis was IgAN, but it is of interest that NAS and FSGS were also found frequently.

Finally, IgAN was also found most frequently (26.1%) in patients with isolated haematuria (Figure 1D) followed by hereditary nephropathies (23.4%). Most patients in this group had normal sCr (93.6%), normotension (87.7%); mean age (25 years) was the lowest of all evaluated groups.

IgAN (21.3%) and FSGS (8.3%) were the most frequent diagnosis in mild renal insufficiency (Figure 1E), while TIN (11.6%) and NV (11.3%) were the most frequent in advanced renal insufficiencies (Figure 1F). Nephrotic proteinuria was common in both groups with renal insufficiency, 58.5 and 52.3%, respectively.

Since 1999, the presence of DM was registered, and diabetic patients represented 12.2% of adult renal biopsies in 1999–2000 with a mean age of 58 years (range 18–80). Only five patients (3.6%) were younger than 30 years, but none of them was in the paediatric age group. DN was found in 42.4% and non-diabetic renal diseases (NDRD) in 47.5%. It is also of interest that a large number of samples were non-diagnostic (10.1%). Mean proteinuria was 8.9 g/24 h. Comparing the DN and NDRD groups, there were no significant differences in predominance of male gender (61/69%), hypertension (83/79.8%), microhaematuria (66/62%), low-grade proteinuria (28/36%) or nephrotic proteinuria (68/62.5%). Mean sCr was 244/207 µmol/l (range 54–1002). Normal renal function was reported in 18.5/33.0% and sCr 111–200 µmol/l in 27.8/27.3%. However, more advanced renal insufficiency was more common in DN compared with NDRD: sCr 201–400 µmol/l in 33.4/24.2% and sCr >400 µmol/l in 19.0/7.5%. Among NDRD, the most frequent diagnoses were IgAN in 17.5%, MGN and NAS in 11.1%, and NV in 9.5%.

The most important clinical and laboratory data related to each diagnostic entity are summarized in Table 8.

USG needle guidance was used most commonly (56.4%), followed by X-ray guidance (35.7%). The other modalities were used rarely: CT in 2.4%, scintigraphy in 4.5% and transjugular biopsy in 0.8%. USG was used more among children (78.9%). The biopsy gun has been used since 1994 with an increasing frequency, from 2.0% in 1994 to 50.3% in 2000. The use of USG compared with X-ray was likewise increasing over the years, being 40.6/51.2% in 1994 and 58.4/35.5% in 2000. Ninety-four clinically serious complications (Table 9) were recorded (3.12% of all biopsies), being more frequent in children (4.37%) than in adults (2.85%). Serious complications were observed most frequently in CT (5.15%) and least frequently in USG without a gun (2.33%). Use of the biopsy gun was not associated with a lower complication rate (2.80 vs 2.88%).

## Discussion

This report provides information about the occurrence of renal diseases diagnosed by renal biopsy during a period of 7 years covering the population of a whole country. Our preliminary results have been presented elsewhere [8–10]. To our knowledge, only three papers have been published dealing systematically with renal biopsy data for a whole country with a population exceeding 10 million [1,3,6]. Since a national registry may fail particularly due to incomplete data collection, we decided to minimize the required data set to achieve a high response rate and ensure it was truly nationally representative.

Records collected by the CRRB showed that males were over-represented in biopsy-proven renal diseases, with the exception of SLE and TBM.

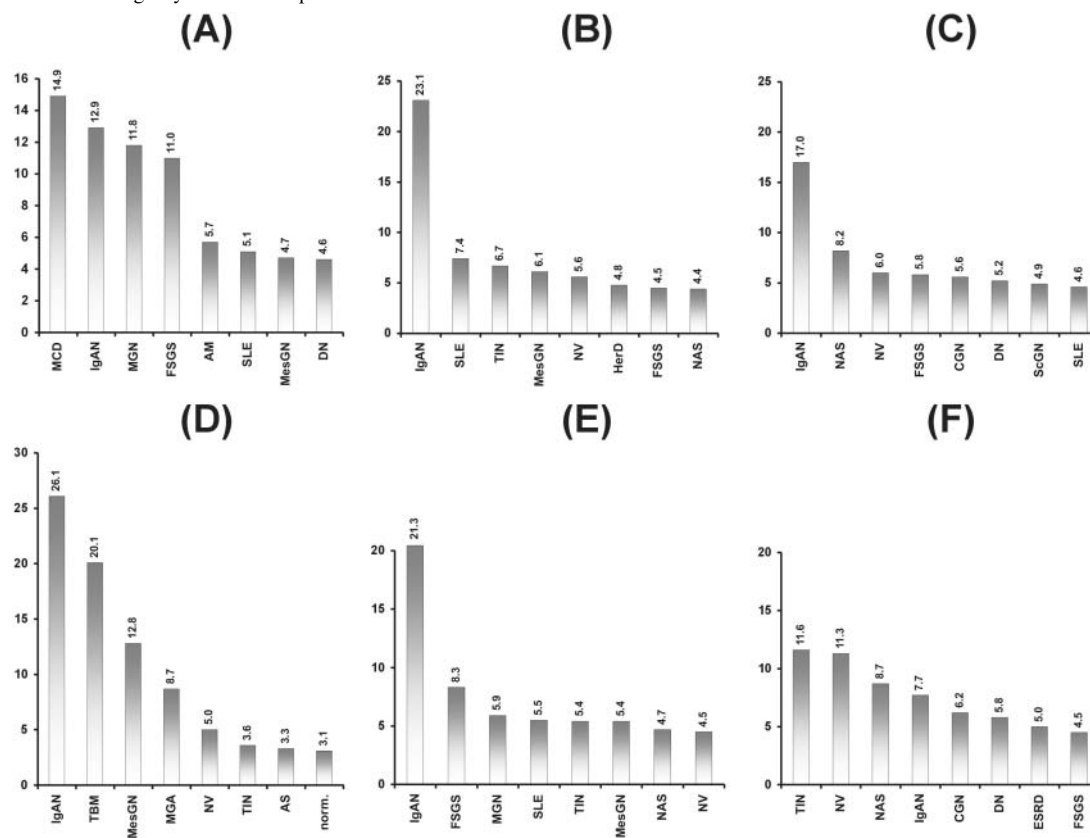

**Fig. 1.** Percentage of different forms of renal diseases according to clinical presentations: (A) patients with nephrotic proteinuria ( $n = 1557$ ); (B) patients with urinary abnormalities ( $n = 1451$ ); (C) patients with nephritic syndrome ( $n = 747$ ); (D) patients with isolated haematuria ( $n = 643$ ); (E) patients with mild renal insufficiency ( $n = 762$ ); (F) patients with advanced renal insufficiency ( $n = 829$ ). For abbreviations see text.

**Table 7.** Distribution of nephrotic proteinuria according to selected diagnosis and age (given as a percentage of all patients with nephrotic proteinuria in each age group)

| Diagnosis      | All  | Children<br>(≤15 years) | Adults      |             |             |            | All  |
|----------------|------|-------------------------|-------------|-------------|-------------|------------|------|
|                |      |                         | 16–30 years | 31–45 years | 46–60 years | > 60 years |      |
| MCD            | 14.9 | 50.5                    | 17.0        | 9.7         | 5.7         | 6.7        | 9.4  |
| IgAN           | 12.9 | 7.8                     | 21.7        | 18.1        | 10.5        | 3.7        | 13.1 |
| MGN            | 11.8 | 2.1                     | 4.7         | 11.3        | 16.3        | 16.8       | 12.7 |
| FSGS           | 11.0 | 12.5                    | 13.0        | 11.3        | 8.9         | 8.9        | 10.3 |
| AM             | 5.7  | 0.5                     | 0.7         | 3.8         | 5.5         | 14.4       | 6.2  |
| SLE            | 5.1  | 3.6                     | 9.3         | 5.6         | 3.6         | 2.5        | 5.1  |
| MesGN          | 4.7  | 6.8                     | 7.0         | 4.4         | 4.1         | 1.8        | 4.3  |
| DM             | 4.6  | 0.0                     | 0.7         | 2.8         | 6.9         | 8.9        | 5.1  |
| MPGN           | 4.1  | 1.6                     | 5.3         | 4.7         | 4.5         | 2.5        | 4.3  |
| NAS            | 3.4  | 0.0                     | 0.7         | 5.0         | 5.0         | 3.7        | 3.7  |
| CGN            | 2.4  | 0.0                     | 2.0         | 0.6         | 3.1         | 4.6        | 2.6  |
| % of all cases | 39.3 | 26.8                    | 28.8        | 42.6        | 49.1        | 59.0       | 42.0 |

AM = amyloidosis; CGN = crescentic glomerulonephritis; DM = diabetes mellitus; FSGS = focal segmental glomerulosclerosis; IgAN = IgA nephropathy; MCD = minimal change disease; MesGN = mesangioproliferative glomerulonephritis; MGN = membranous glomerulonephritis; MPGN = membranoproliferative glomerulonephritis; NAS = hypertensive nephroangiosclerosis; SLE = systemic lupus erythematosus.

Other investigators have also observed this finding in 65 [1] and 66% [3], respectively.

More than a quarter of renal biopsies were performed in paediatric units. We used an age limit for children of 15 years to allow comparison with

other studies. There are few epidemiological data concerning renal biopsy in children in European registries. Coppo *et al.* [11] reported 432 children ≤15 years old undergoing renal biopsy in 1992–1994, representing only 5.7% of the all-Italian Registry

**Table 8.** The epidemiology of selected glomerulopathies and TIN, ranked by frequency showing the incidence of different parameters at the time of biopsy, re-biopsies excluded

| Diagnosis       | No. of cases | % of CRRB | % of group | Incidence (p.m.p./year) | Mean age (years) | Gender (% male) | Hypertension (%) | Mean sCr (μmol/l) (HD excluded) | % of RI (sCr > 110 μmol/l) | % of HD (sCr > 600 μmol/l) | Nephrotic proteinuria (%) | Nephritic syndrome (%) |
|-----------------|--------------|-----------|------------|-------------------------|------------------|-----------------|------------------|---------------------------------|----------------------------|----------------------------|---------------------------|------------------------|
| Primary GN      | 2333         | 59.8      | 100.0      | 32.4                    | 33               | 61.9            | 35.4             | 114                             | 30.4                       | 2.0                        | 43.4                      | 9.9                    |
| MCD             | 289          | 7.5       | 12.7       | 4.0                     | 25               | 56.7            | 20.4             | 83                              | 10.7                       | 0.0                        | 77.8                      | 3.8                    |
| MGA             | 135          | 3.5       | 6.4        | 1.9                     | 21               | 43.7            | 8.9              | 80                              | 7.4                        | 0.7                        | 3.7                       | 0.7                    |
| FSGS            | 251          | 6.5       | 9.5        | 3.5                     | 37               | 60.2            | 45.4             | 127                             | 39.8                       | 0.4                        | 65.7                      | 17.1                   |
| MGN             | 217          | 5.6       | 9.0        | 3.0                     | 49               | 58.5            | 49.8             | 115                             | 30.4                       | 0.0                        | 81.6                      | 12.0                   |
| MesGN           | 260          | 6.9       | 12.3       | 3.7                     | 28               | 61.9            | 21.5             | 94                              | 21.9                       | 1.4                        | 26.8                      | 7.2                    |
| IgAN            | 804          | 20.8      | 32.9       | 11.2                    | 30               | 67.7            | 32.1             | 112                             | 28.1                       | 0.5                        | 24.1                      | 15.8                   |
| PEGN            | 31           | 0.8       | 1.3        | 0.4                     | 38               | 61.3            | 41.9             | 146                             | 54.8                       | 0.0                        | 48.4                      | 32.3                   |
| MPGN            | 111          | 2.9       | 5.1        | 1.5                     | 37               | 67.6            | 45.9             | 130                             | 40.5                       | 3.6                        | 55.0                      | 18.9                   |
| CGN             | 75           | 1.9       | 2.8        | 1.0                     | 52               | 60.0            | 69.3             | 274                             | 86.7                       | 29.3                       | 48.0                      | 56.0                   |
| SGN             | 63           | 1.6       | 2.5        | 0.9                     | 47               | 68.2            | 74.6             | 243                             | 87.3                       | 15.9                       | 42.9                      | 58.7                   |
| Unclassified GN | 97           | 2.5       | 3.8        | 1.3                     | 40               | 45.4            | 45.4             | 135                             | 38.1                       | 1.0                        | 30.9                      | 11.3                   |
| Secondary GN    | 990          | 25.6      | 100.0      | 13.8                    | 39               | 46.8            | 36.5             | —                               | 41.4                       | 8.3                        | 34.7                      | 18.3                   |
| SLE             | 228          | 5.9       | 23.0       | 3.2                     | 34               | 22.8            | 35.5             | 113                             | 27.6                       | 5.3                        | 33.3                      | 14.9                   |
| HSP             | 57           | 1.5       | 5.7        | 0.8                     | 19               | 63.2            | 26.3             | 88                              | 10.5                       | 0.0                        | 31.6                      | 5.3                    |
| NV              | 154          | 4.0       | 15.5       | 2.1                     | 54               | 56.5            | 44.8             | 271                             | 83.1                       | 20.8                       | 22.7                      | 31.2                   |
| AM              | 98           | 2.5       | 9.9        | 1.4                     | 59               | 52.0            | 43.9             | 174                             | 53.1                       | 6.1                        | 86.7                      | 25.5                   |
| MM              | 29           | 0.8       | 2.9        | 0.4                     | 60               | 65.5            | 41.4             | 274                             | 86.2                       | 37.9                       | 34.5                      | 13.8                   |
| DN              | 105          | 2.7       | 10.5       | 1.5                     | 56               | 63.8            | 78.1             | 199                             | 77.1                       | 8.6                        | 65.7                      | 37.1                   |
| AS              | 68           | 1.8       | 6.9        | 0.9                     | 17               | 55.9            | 8.8              | 82                              | 14.7                       | 0.0                        | 27.9                      | 5.9                    |
| TBM             | 192          | 5.0       | 19.3       | 2.7                     | 22               | 44.8            | 9.9              | 72                              | 2.6                        | 0.0                        | 7.3                       | 0.5                    |
| NAS benign      | 91           | 2.3       | 68.9       | 1.3                     | 51               | 74.7            | 84.1             | 237                             | 78.0                       | 5.5                        | 45.0                      | 45.0                   |
| NAS malignant   | 41           | 1.1       | 31.1       | 0.6                     | 48               | 75.6            | 97.6             | 309                             | 90.2                       | 31.7                       | 24.3                      | 48.6                   |
| TIN             | 170          | 4.4       | 100.0      | 2.4                     | 41               | 57.6            | 40.0             | 252                             | 80.6                       | 16.5                       | 15.3                      | 20.6                   |

AM = amyloidosis; AS = Alport syndrome; CGN = crescentic glomerulonephritis; DN = diabetic nephropathy; FSGS = focal segmental glomerulosclerosis; HD = haemodialysis; HSP = Henoch–Schönlein purpura; IgAN = IgA nephropathy; MCD = minimal change disease; MesGN = mesangiolipofibrin glomerulonephritis; MGA = minor glomerular abnormalities; MGN = membranous glomerulonephritis; MM = myeloma kidney; MPGN = membranoproliferative glomerulonephritis; NAS = hypertensive nephroangiosclerosis; NV = necrotizing vasculitis; PEGN = proliferative endocapillary glomerulonephritis; RI = renal insufficiency; SGN = secondary glomerulonephritis; TBM = thin basement membrane glomerulopathy; TIN = tubulointerstitial nephritis.

**Table 9.** Clinically significant complications after renal biopsy

| Type                        | No of cases | % of all renal biopsies | Concomitant co-morbidity (%) |              |      |       |
|-----------------------------|-------------|-------------------------|------------------------------|--------------|------|-------|
|                             |             |                         | Renal insufficiency          | Hypertension | Both | Total |
| Haemorrhage and hypotension | 35          | 0.87                    | 20.0                         | 13.3         | 28.6 | 65.7  |
| Gross haematuria            | 45          | 1.12                    | 17.8                         | 8.9          | 31.1 | 57.8  |
| Symptomatic haematoma       | 45          | 1.12                    | 6.7                          | 8.9          | 26.7 | 42.3  |
| Total                       | 125         | 3.12                    | 14.4                         | 11.2         | 28.8 | 53.6  |
| Children                    | 31          | 4.37                    |                              |              |      |       |
| Adults                      | 94          | 2.85                    |                              |              |      |       |

of renal biopsy. Rivera *et al.* [3] and Briganti *et al.* [7] reported 487 and 104 renal biopsies performed among children <15 years old, which represented 7.0 and 5.2% of all biopsies, respectively. Our registry reports almost twice the total number of paediatric renal biopsies ( $n = 710$ , i.e. 17.7% of all biopsies), apparently indicating more liberal criteria for renal biopsy among our paediatric nephrologists. Higher proportions of paediatric biopsies have also been reported in Asia, with 40.5% out of all renal biopsies, in Korea [5] and in Japan with 20% [6].

It is rather difficult to report definitive epidemiological data on the frequency of the various forms of GN for several reasons. First, the renal biopsy indication policy varies from centre to centre. Secondly, renal biopsy is often not performed when the likelihood of a therapeutic consequence is low (e.g. steroid-sensitive nephrotic syndrome in children, intermittent haematuria without proteinuria, bilateral small kidneys, post-infection GN). For this reason, the true incidence of MCD, PEGN and IgAN will be under-represented. Using the experience of biopsy registries with a similar design [2], we estimate that the CRRB includes up to 70–85% of these patients. Thirdly, insufficient tissue did not always allow complete evaluation, i.e. by immunofluorescence, so that a correct histological diagnosis could not be established (e.g. IgAN). Other reports are similarly incomplete; for example, only 78% out of all samples were evaluated by immunofluorescence in a Danish study [2] and 56.5% in Japan [6], where 42.5% cases of MesGN were not evaluated by immunofluorescence. During the 7 year survey, we could observe a ‘crossover’ phenomenon with decreasing incidence of MesGN and increasing incidence of IgAN, suggesting increasingly complete evaluation by immunofluorescence. Electron microscopy is rather expensive and was not used in this study for all biopsies, although it is a crucial diagnostic tool in some circumstances, e.g. establishing the diagnosis of MCD and TBM. The frequency of electron microscopy did not differ compared with other reports worldwide (~30% of all samples). Newer techniques, e.g. polymerase chain reaction (PCR) or *in situ* hybridization, would seem to be helpful in the future [12], but certainly their routine use is not intended.

Our report showed that renal biopsy was predominantly performed in patients with primary and secondary GN. Despite any possible local influence of renal

biopsy policy, the incidence of GN (47 p.m.p./year) was comparable with that seen in other European countries: 34, 39, 63 and 86 cases p.m.p./year [2–4,11]. The distribution pattern of renal diagnosis also corresponded to other European series. IgAN was the most frequent disease among all biopsied patients as well as among primary GN, reaching an incidence of 11.2 p.m.p./year. A similar frequency has been also reported from Italy, 8.4 p.m.p./year [1], but is higher in France at 25–31 p.m.p./year [4], and lower in Spain at 7.9 p.m.p./year [3], Denmark at 1.8 p.m.p./year [2] and Central Kentucky, USA at 5.4 p.m.p./year [13]. The true incidence of IgAN is probably higher since another 11.3% of primary GN was diagnosed as MesGN, and not all these cases were evaluated by immunofluorescence.

Our incidence of unclassified GN is also higher (4.1%) than reported in other studies, e.g. 0.9% in Korea [5] and 1.2% in Japan [6]; data are not available in European registries.

GN induced by immunological factors was the most frequent among secondary GNs. The incidence of SLE was relatively high, and comparable data have been reported from Italy [1] with 2.6 p.m.p./year and Spain [3] with 5.6 p.m.p./year. AM was the most frequent dysgammaglobulinaemia-associated GN, especially in the elderly, as has been repeatedly reported by other investigators [17].

Among those with nephrotic proteinuria, MGN, IgAN, MCD and FSGS were the most frequent diagnoses in CRRB. With the exception of IgAN, this is in accordance with other experience [1–4]. IgAN was present in a similar percentage of adult nephrotic syndrome patients (14%) in the report of Haas *et al.* [14], while others found lower frequencies, 8 [15] and 2.4% [1]. Since 1999 when the serum albumin level was recorded, the incidence of nephrotic syndrome among IgAN patients decreased to only 6.5%, indicating a large proportion of IgAN patients with nephrotic range proteinuria but without frank nephrosis. This figure is very similar to that (6.0%) reported from Korea [5]. This may be because IgAN patients often undergo renal biopsy at a more advanced stage of disease.

Persistent urinary abnormalities represented the second most frequent clinical syndrome (36.2%), rather higher than that observed in Italy (30.8%) [1] but much lower than reported from Japan (48.1%) [6].



IgAN was the disease diagnosed predominantly in this group (23.1%), similar to data from Italy (29.8%); however, in our study, the next most common was SLE (7.4%), which was quite different from the Italian experience (28.2%).

The presence of nephritic syndrome is usually taken as a sign of acute renal inflammation. It is therefore not surprising that IgAN, NV and CGN were found commonly among those with nephritic syndrome. However, it is of interest that NAS, FSGS and also DN were recorded frequently among those with nephritic syndrome even though haematuria is not usually regarded as a typical feature of these diseases. The experience from Italy [1] was quite different, IgAN representing 14.0% of patients presenting with nephritic syndrome but SLE 20.1 and PEGN 16.1%.

IgAN and TBM glomerulopathy were the most frequent diagnoses in patients with isolated haematuria, which is not significantly different from other reports in Europe [1–3] and elsewhere [5,6].

Concerning diabetic patients, it is not surprising that the incidence of DN was low, since isolated proteinuria in patients with long-standing diabetes is not an indication for renal biopsy, and those diabetics who have a renal biopsy are likely to have atypical clinical features suggesting a cause other than DN. However, since 1999, we observed an apparent doubling of the incidence of DN [10], which we ascribe to local policies on the indications for renal biopsy. Recently, the influence of varying renal biopsy policies has been stressed by Mazzucco *et al.* [16]. Since 1999, diabetic patients represented 12.2% of all adult biopsies but about half had non-diabetic renal disease. In this group, the percentages of low-grade proteinuria, normal renal function, the number of patients on haemodialysis and mean age were significantly higher compared with those with DN. There was a surprisingly high number of diabetic patients with renal vasculitis (9.5%). On the other hand, in 1999–2000, a high percentage of microhaematuria (66%) was also found among patients with DN; comparable data from other registries in this respect are not available.

With regard to post-biopsy complications, we recorded lower rates of clinically serious complications compared with the experience of other authors [17] who reported gross haematuria in 5–7% or severe perirenal haemorrhage in 0.2–1.4%. The presence of hypertension and renal insufficiency was related to the occurrence of haemorrhage with hypotension. Contrary to other reports [18], we did not observe a significant decrease in complication rate when the biopsy gun was used, but we are not aware whether a thinner needle gauge was used in the gun. Although some authors [19] did not observe any serious complications using the biopsy gun, we believe that despite these newer devices, the risk of renal biopsy as an invasive procedure remains. USG-guided biopsy was predominant in our series, particularly among children, but still a large number of biopsies were performed under X-ray guidance despite the wide availability of USG. This may be the result of local policy, perhaps influenced

by good personal experience with particular techniques. USG guidance was also reported as predominant (~85%) in Europe [20].

CRRB continues to collect data, and a number of new features are planned: (i) the CRRB records are now available on the Internet ([www.nefrol.cz](http://www.nefrol.cz)); (ii) 10 year follow-up data are being collected, particularly in patients with GN; and (iii) comparison of CRRB records is being made with the Czech Registry of Renal Replacement Therapy, which uses ESRD as the identifier.

In conclusion, CRRB, which includes renal biopsies of the native kidney performed in almost all Czech renal units over a period of 7 years, represents an important contribution to the epidemiology of renal diseases in the Czech Republic, and permits a valuable comparison with other renal biopsy registries worldwide. Our results show that the frequency of the main groups of renal diseases and the distribution pattern of different forms of GN change only slightly over a long period. Two groups of disease were particularly frequent: primary GN (59.8%) and secondary GN (25.6%) which showed incidences of 32.4 and 13.8 p.m.p./year, respectively. Particular attention should also be paid to TIN and vascular diseases, in which a significant percentage of patients showed renal insufficiency. This report is intended to serve as a source for nephrologists, researchers and health care providers to stimulate new analysis and investigation, to improve treatment of renal diseases, to design nationwide trials, and to help national and regional governments to develop protocols for preventive medicine.

**Acknowledgements.** The authors thank all colleagues from the participating renal units listed below for supplying the requested data. We gratefully acknowledge the invaluable computer and statistical assistance of Dr Martin Vyhnanovský and Dr Jiří Gallas, and the linguistic text revision of Dr René Prahel.

Brno: Faculty of Medicine: Department of Medicine, Hospital Sv. Anna (D. Sobotová); Department of Medicine, Hospital Bohunice (H. Hertlová); Department of Pathology (Dr Hušek); 2nd Department of Paediatrics (Z. Doležal, J. Štarha). České Budějovice: Regional Hospital, Department of Medicine (J. Hána); Department of Pathology (Dr Přádná); Department of Paediatrics (V. Smrčka). Hradec Králové: Faculty of Medicine: 1st Department of Medicine (P. Fixa, V. Herout, J. Zahradník); 2nd Department of Medicine (J. Kačerovský, E. Pintérová); Department of Pathology (M. Podhola); Department of Paediatrics (Z. Pellantová, S. Skálová). Litoměřice: District Hospital, Department of Paediatrics (J. Rambousek). Karviná: District Hospital, Department of Medicine (J. Kubátko). Olomouc: Faculty of Medicine: 3rd Department of Medicine (K. Konečný, K. Krejčí, J. Zadražil); Department of Pathology (Dr Tichý). Ostrava: Department of Medicine (I. Valkovský); Department of Pathology (R. Čurík). Ostrava Poruba: Centre for Paediatric Dialysis and Nephrology, University Hospital (M. Hladík). Plzeň: Army Hospital, Department of Medicine (M. Pojer, K. Smetana); Faculty of Medicine: 1st Department of Medicine (I. Malkusová, K. Opatrný); Department of Pathology (Dr Hess); Department of Paediatrics (Dr Huml). Prague: 1st Faculty of Medicine: 1st Department of Medicine (E. Jančová, M. Merta, I. Rychlík, R. Ryšavá, V. Tesař, J. Žabka); 2nd Department of Medicine (M. Havrda, V. Knotková); 1st Department of Pathology (E. Honsová, A. Stejskalová, Z. Vernerová); 2nd Faculty of Medicine: Department of Medicine

(V. Martínek, K. Matoušovic, J. Osten, J. Vrzáňová); 1st Department of Paediatrics (J. Dušek, J. Feber, J. Janda, E. Šimková, K. Vondrák); Department of Pathology (J. Stejskal); 3rd Faculty of Medicine: 1st Department of Medicine (M. Horácková, M. Jaroš); Central Army Hospital (V. Monhart, K. Petřů); Hospital Homolka (L. Stráník, L. Svoboda); Thomayer Teaching Hospital, Department of Paediatrics (A. Kolský); Institut for Clinical and Experimental Medicine: Department of Nephrology (P. Bubeníček, J. Lácha, O. Viklický); Department of Pathology (M. Chadimová). Svitavy: Department of Medicine and Dialysis Unit (M. Nývlt). Ústí/Labem: Masaryk Hospital, Department of Paediatrics (Z. Hynková, J. Laubová).

*Conflict of interest statement.* None declared.

## References

1. Schena FP. Survey of the Italian Registry of renal Biopsies. Frequency of the renal diseases for 7 consecutive years. *Nephrol Dial Transplant* 1997; 12: 418–426
2. Heaf JG, Løkkegaard H, Larsen S. The epidemiology and prognosis of glomerulonephritis in Denmark 1985–97. *Nephrol Dial Transplant* 1999; 14: 1889–1897
3. Rivera F, López-Gómez JM, Pérez-García R. Frequency of renal pathology in Spain 1994–1999. *Nephrol Dial Transplant* 2002; 17: 1594–1602
4. Simon P, Ramée MP, Autuly V *et al.* Epidemiology of primary glomerular disease in a French region. Variations according to period and age. *Kidney Int* 1994; 46: 1192–1198
5. Choi IJ, Jeong HJ, Han DS *et al.* An analysis of 4514 cases of renal biopsy in Korea. *Yonsei Med J* 2001; 42: 247–254
6. Research Group on Progressive Chronic Renal Disease. Nationwide and long-term survey of primary glomerulonephritis in Japan as observed in 1850 biopsied cases. *Nephron* 1999; 82: 205–213
7. Briganti EM, Dowlin J, Finlay M *et al.* The incidence of biopsy-proven glomerulonephritis in Australia. *Nephrol Dial Transplant* 2001; 16: 1364–1367
8. Rychlík I, Jančová E, Tesař V *et al.*, on behalf of CRRB. The Czech Registry of Renal Biopsies (CRRB)—five years experience (1994–1998). *Nephrol Dial Transplant* 2001; 16: A68
9. Rychlík I, Jančová E, Tesař V, on behalf of CRRB. IgA nephropathy (IgAN) in the Czech registry of renal biopsies (CRRB) in years 1995–1998. *Nephrol Dial Transplant* 2000; 15: A88
10. Rychlík I, Jančová E, Tesař V, on behalf of CRRB. Diabetic and non-diabetic renal disease among diabetic patients undergoing renal biopsy in the Czech Republic in years 1999–2000. *J Am Soc Nephrol* 2002; 13: 636A
11. Coppo R, Gianoglio B, Porcellini MG, Maringhini S. Frequency of renal diseases and clinical indications for renal biopsy in children (Report of the Italian National Registry of Renal Biopsies in Children). *Nephrol Dial Transplant* 1998; 13: 293–297
12. Schena P, Gesualdo L. Renal biopsy beyond histology and immunofluorescence. *Nephrol Dial Transplant* 1994; 9: 1541–1544
13. Wyatt RJ, Julian BA, Baehler RW *et al.* Epidemiology of IgA nephropathy in central and eastern Kentucky for the period 1975 through 1994. Central Kentucky Region of the Southeastern United States IgA Nephropathy DATABANK Project. *J Am Soc Nephrol* 1998; 9: 853–858
14. Haas M, Meehan SM, Karrison TG, Spargo BH. Changing etiologies of unexplained adult nephrotic syndrome. *Am J Kidney Dis* 1997; 30: 621–631
15. Korbet SM, Genchi RM, Borok RZ, Schwartz MM. The racial prevalence of glomerular lesion in nephrotic adults. *Am J Kidney Dis* 1996; 27: 647–651
16. Mazzucco G, Bertani T, Fortunato M *et al.* Different patterns of renal damage in type 2 diabetes mellitus: a multicentric study on 393 biopsies. *Am J Kidney Dis* 2002; 39: 713–720
17. Ponticelli C, Mihatsch MJ, Imbasciati E. Renal biopsy: performance and interpretation. In: Davison AM *et al.*, eds. *Oxford Textbook of Clinical Nephrology*, 2nd ed., Oxford University Press, Oxford; 1999: 158–159
18. Riehl J, Maigatter S, Kierdorf H *et al.* Percutaneous renal biopsy: comparison of manual and automated puncture techniques with native and transplanted kidneys. *Nephrol Dial Transplant* 1994; 9: 1568–1574
19. Hergesell O, Felten H, Andrassy K *et al.* Safety of ultrasound-guided percutaneous renal biopsy—retrospective analysis of 1090 consecutive cases. *Nephrol Dial Transplant* 1998; 13: 975–977
20. Fuiano G, Mazza G, Comi N *et al.* Current indications for renal biopsy: a questionnaire-based survey. *Am J Kidney Dis* 2000; 35: 448–457

*Received for publication: 5.5.03*

*Accepted in revised form: 6.9.04*
